# Supplementary material for: Association of Sleep Duration and Weekend Catch-Up Sleep with Suicidal Ideation among Adolescents with Atopic Dermatitis
Source: MDPI journal article supplement (doi:10.3390/jcm12247716), 2023-12-15
Supplement: s1 [file s1]

## Supplementary materials

**Table S1.** Adjusted odds ratio for suicidal ideation in adolescents with atopic dermatitis.

|                               |            | Suicidal ideation |         |                  |         |                  |         |
|-------------------------------|------------|-------------------|---------|------------------|---------|------------------|---------|
|                               |            | Model 1           | p-value | Model 2          | p-value | Model 3          | p-value |
|                               |            | OR (95% CI)       |         | OR (95% CI)      |         | OR (95%CI)       |         |
| <b>Sleep satisfaction</b>     |            |                   |         |                  |         |                  |         |
|                               | Enough     | Reference         |         | Reference        |         | Reference        |         |
|                               | A little   | 1.44 (1.36-1.49)  | <0.001  | 1.36 (1.31-1.44) | <0.001  | 1.04 (1.01-1.09) | <0.001  |
|                               | Not enough | 2.51 (2.32-2.58)  | <0.001  | 2.23 (2.18-2.38) | <0.001  | 1.14 (1.07-1.19) | <0.001  |
| <b>Average sleep duration</b> |            |                   |         |                  |         |                  |         |
|                               | <5hr       | 1.92 (1.71-2.08)  | <0.001  | 1.86 (1.74-1.94) | <0.001  | 1.31 (1.24-1.43) | <0.001  |
|                               | 5-6hr      | 1.31 (1.24-1.37)  | <0.001  | 1.32 (1.26-1.37) | <0.001  | 1.16 (1.07-1.21) | <0.001  |
|                               | 6-7hr      | 1.15 (1.11-1.19)  | <0.001  | 1.14 (1.10-1.21) | <0.001  | 1.09 (1.03-1.14) | 0.003   |
|                               | 7-8hr      | Reference         |         | Reference        |         | Reference        |         |
|                               | 8-9hr      | 0.94 (0.88-0.97)  | <0.001  | 0.91 (0.87-0.97) | <0.001  | 1.00 (0.97-1.07) | 0.736   |
|                               | ≥9hr       | 0.91 (0.86-0.96)  | 0.003   | 0.93 (0.89-0.98) | 0.015   | 0.97 (0.89-1.04) | 0.917   |
| <b>Weekend catch-up sleep</b> |            |                   |         |                  |         |                  |         |
|                               | ≤0hr       | Reference         |         | Reference        |         | Reference        |         |
|                               | 0-1hr      | 0.84 (0.78-0.86)  | <0.001  | 0.86 (0.82-0.91) | <0.001  | 0.91 (0.87-0.96) | <0.001  |
|                               | 1-2hr      | 0.81 (0.79-0.87)  | <0.001  | 0.84 (0.81-0.88) | <0.001  | 0.89 (0.85-0.94) | <0.001  |
|                               | >2hr       | 0.82 (0.81-0.86)  | <0.001  | 0.83 (0.82-0.89) | <0.001  | 0.87 (0.81-0.92) | <0.001  |

Abbreviations: OR, odds ratio; CI, confidence interval

NOTE. After the selection of significant covariates, univariate and multivariate logistic regression analyses were performed to identify factors associated with suicidal ideation in adolescents with AD. Model 1 was adjusted for sex and grade; Model 2 was adjusted for Model 1 variables + socioeconomic variables (residential type, socioeconomic state, and academic achievement) and health-related behavioral variables (breakfast skipping, smoking, alcohol drinking, and vigorous exercise); and Model 3 was adjusted for Model 2 variables + psychological variables (perceived status of health, perceived level of happiness, perceived frequency of stress, and experience of depressive symptoms).
